# Supplementary material
Source: publisher site journal article supplement (https://www.spandidos-publications.com/4513/downloadSupplementary)
Supplement: Supplementary file 1 [file downloadSupplementary]

Table SI: Overview of KEGG-pathways with their associated differentially expressed genes in imatinib resistance.

| Pathway |                            | Genes                                                                                                                                                            | P-value |
|---------|----------------------------|------------------------------------------------------------------------------------------------------------------------------------------------------------------|---------|
| Overlap | Focal adhesion             | <i>BCL-2, IGF1, RELN, LAMC1, VAV1, FN1</i>                                                                                                                       | 0.01    |
|         | PI3K-Akt signaling pathway | <i>BCL-2, IGF1, RELN, PIK3API, KIT, LAMC1, FN1</i>                                                                                                               | 0.02    |
| R1      | PI3K-Akt signaling pathway | <i>BCL-2, KIT, FN1, IGF1, IL2RG, LAMC1, PIK3API, RELN, SYK</i>                                                                                                   | 0.03    |
|         | Small lung cancer          | <i>BCL-2, RB1, FN1, LAMC1</i>                                                                                                                                    | 0.05    |
| R2      | FcγR-mediated phagocytosis | <i>FCGR2A, GAB2, WASF1, CFL2, DOCK2, PIK3CG, PLD1, PRKCB, PTPRB, VAV1</i>                                                                                        | 0.004   |
|         | Pathways in cancer         | <i>APC, BCL-2, BRCA2, CXCL8, KIT, MDM2, RUNX1T1, SKP2, CCNE2, DAPK1, FGFR3, FN1, FZD3, FZD5, IGF1R, IGF1, LAMB1, LAMC1, PIK3CG, PRKCB, SLC2A1, TGFBR2, VEGFA</i> | 0.04    |

P<0.05. R1, replicate 1; R2, replicate 2; overlap, both replicates.

Table SII. Number of genes with min. 3 differentially methylated CpGs per gene in all genomic regions in imatinib and nilotinib resistance compared to K-562 cells.

| Sample    | Number of genes with min. 3 CpGs (methylation profile) | Overlap with differentially expressed genes (GEP) | Overlap between biological replicates | Overlap between IM resistance |
|-----------|--------------------------------------------------------|---------------------------------------------------|---------------------------------------|-------------------------------|
| lowIM-R1  | 5226                                                   | 302                                               | 176                                   | 50                            |
| lowIM-R2  | 3386                                                   | 296                                               |                                       |                               |
| highIM-R1 | 6556                                                   | 403                                               | 112                                   |                               |
| highIM-R2 | 4987                                                   | 398                                               |                                       |                               |
| N-R1      | 5320                                                   | 403                                               | 44                                    |                               |
| N-R2      | 2517                                                   | 159                                               |                                       |                               |

All differentially methylated CpGs were included. R1, replicate 1; R2, replicate 2; lowIM, 0.5  $\mu$ M imatinib; highIM, 2  $\mu$ M imatinib; N, 0.1  $\mu$ M nilotinib; GEP, gene expression profile.

Table SIII. Number of genes with min. 3 differentially methylated CpGs in the promoter region in imatinib and nilotinib resistance compared with K-562 cells.

| Sample    | Number of genes with min. 3 CpGs in TSS (methylation profile) | Overlap with differentially expressed genes (GEP) | Overlap between biological replicates | Overlap between TKI resistance |
|-----------|---------------------------------------------------------------|---------------------------------------------------|---------------------------------------|--------------------------------|
| lowIM-R1  | 1171                                                          | 57                                                | 12                                    | 5                              |
| lowIM-R2  | 438                                                           | 34                                                |                                       |                                |
| highIM-R1 | 1399                                                          | 98                                                | 17                                    |                                |
| highIM-R2 | 1070                                                          | 80                                                |                                       |                                |
| N-R1      | 1214                                                          | 95                                                |                                       | 7                              |
| N-R2      | 404                                                           | 21                                                |                                       |                                |

CpGs located in the TSS were included. R1, replicate 1; R2, replicate 2; lowIM, 0.5  $\mu$ M imatinib; highIM, 2  $\mu$ M imatinib; N, 0.1  $\mu$ M nilotinib; GEP, gene expression profile; TSS, transcriptional start side; TKI, TKI, tyrosine kinase inhibitor.
